# Supplementary material
Source: Springer Nature journal article supplement (https://www.springermedizin.de/resource/supplementary/12887_2012_701_MOESM2_ESM.pdf/9475488)
Supplement: MOESM2 [file 9475488]

Session 1: goal setting; processing dysfunctional cognitions; introduction of communication skills

Session 2: working on the relationship; training of communication skills

Session 3: handling conflicts in diabetes specific and non-specific conflict situations

Session 4: handling conflicts; practicing new strategies and communication skills

Session 5: practicing new strategies and communication skills on individual problems

Session 6: individual telephone contact
